# Supplementary material for: Whole gut virome analysis of 476 Japanese revealed a link between phage and autoimmune disease
Source: PubMed Central journal article supplement (PMC8761997; doi:10.1136/annrheumdis-2021-221267), 2021-12-08
Supplement: annrheumdis-2021-221267supp001.pdf [file annrheumdis-2021-221267supp001.pdf]

## **Supplementary information**

### **A whole gut virome analysis of 476 Japanese revealed a link between phage and autoimmune disease**

Tomofuji Y et al.

Corresponding to Yukinori Okada (yokada@sg.med.osaka-u.ac.jp)

#### **Table of contents**

|                                                                                                                                        |          |
|----------------------------------------------------------------------------------------------------------------------------------------|----------|
| <b>■Supplementary Figures</b> .....                                                                                                    | <b>1</b> |
| 1. Pipeline for virome analysis from shotgun sequencing data.....                                                                      | 1        |
| 2. Bacterial relative abundance at the genus level (L6).....                                                                           | 2        |
| 3. Association tests for disease-specific virus-bacterium interaction.....                                                             | 3        |
| 4. Analysis of the bacterial target of viruses based on the CRISPR spacers .....                                                       | 4        |
| <b>■Supplementary Tables</b> .....                                                                                                     | <b>5</b> |
| 1. Characteristics of the study population.....                                                                                        | 5        |
| 2. Detection ratio of the viral clades.....                                                                                            | 8        |
| 3. Association of age and sex to the viral abundances.....                                                                             | 9        |
| 4. Sub-analysis of the crAss-like phage abundance for RA .....                                                                         | 10       |
| 5. Sub-analysis of the viral abundance for SLE.....                                                                                    | 11       |
| 6. Sub-analysis of the crAss-like phage abundance for combined autoimmune diseases (RA, SLE, and MS).....                              | 12       |
| 7. Meta-analysis for the association between combined autoimmune diseases (RA, SLE, and MS) and the viral abundances.....              | 13       |
| 8. Case–control comparison of the absence/presence state of crAss-like phages for combined autoimmune diseases (RA, SLE, and MS) ..... | 14       |

|                                                                                                                                                            |    |
|------------------------------------------------------------------------------------------------------------------------------------------------------------|----|
| 9. Case-control comparison of <i>crAssphage</i> (NC_024711.1) and other <i>crAss</i> -like phages for combined autoimmune diseases (RA, SLE, and MS) ..... | 15 |
| 10. Virus-bacterium pairs with significant association .....                                                                                               | 16 |
| 11. Sub-analysis for the virus-bacterium association analysis .....                                                                                        | 17 |

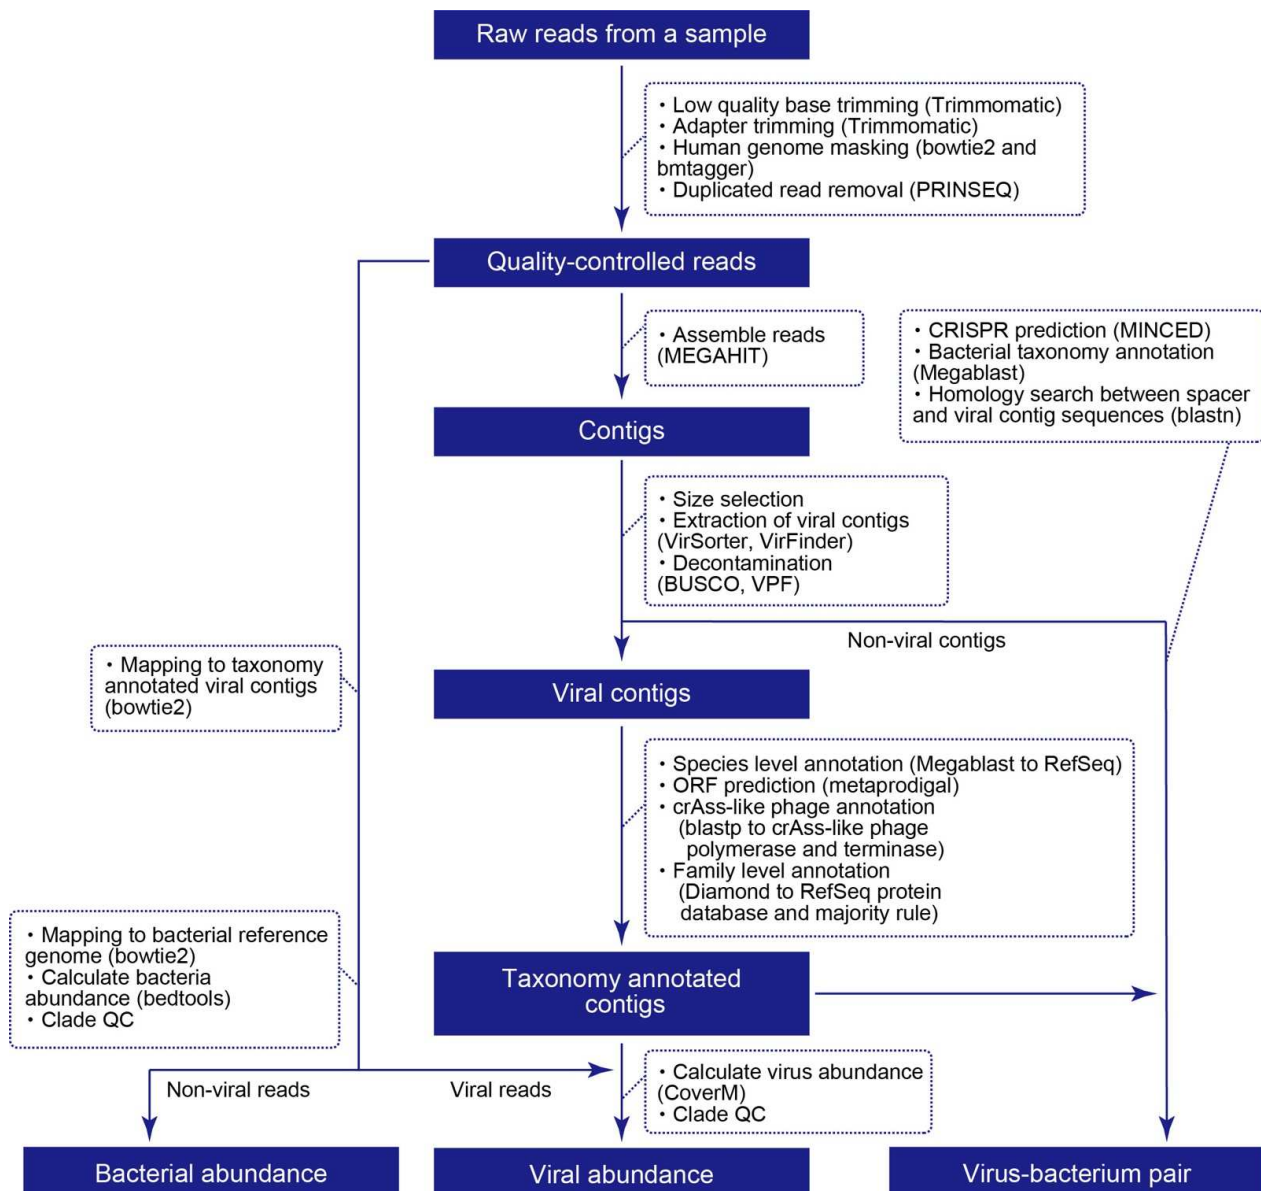

### Supplementary Figure 1. Pipeline for virome analysis from shotgun sequencing data.

Whole-genome shotgun sequencing reads of the gut microbiome were processed following this pipeline. This pipeline produces three outputs (bacterial abundance, viral abundance, and virus-bacterium pair). CRISPR, clustered regularly interspaced short palindromic repeat; ORF, open reading frame; QC, quality check; RefSeq, NCBI Reference Sequence Database.

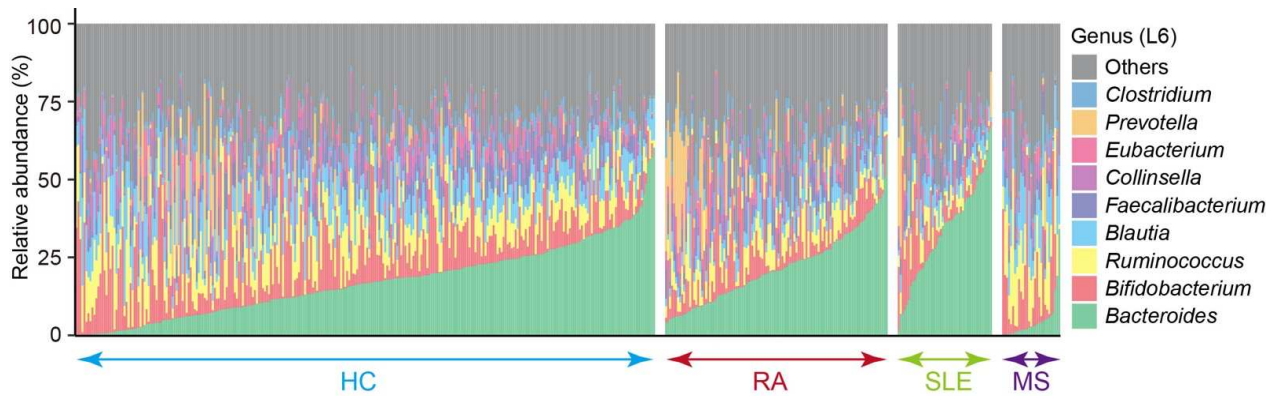

**Supplementary Figure 2. Bacterial relative abundance at the genus level (L6).**

HC, healthy control; MS, multiple sclerosis; RA, rheumatoid arthritis; SLE, systemic lupus erythematosus.

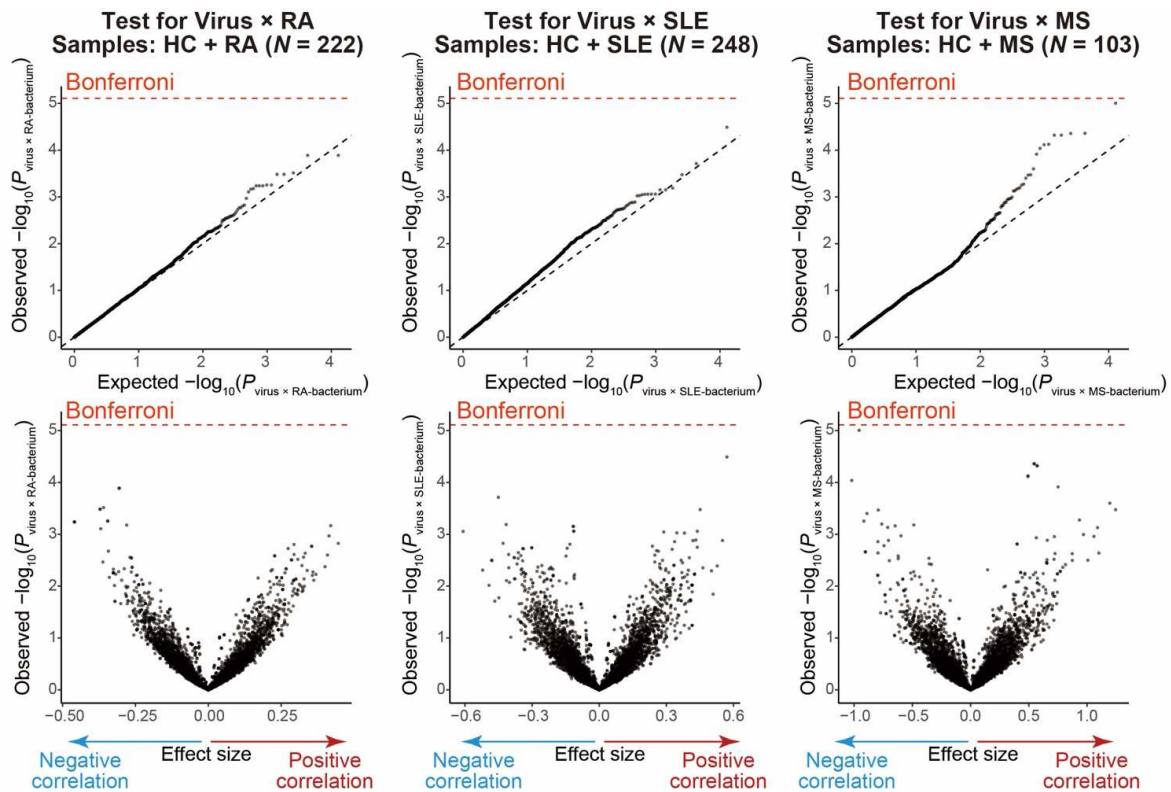

**Supplementary Figure 3. Association tests for disease-specific virus-bacterium interaction.**

(**Top**), A quantile–quantile plot of the p-values from the disease specific virus-bacterium association analysis (left RA, middle SLE, right MS). The x-axis indicates  $-\log_{10}(P_{\text{virus} \times \text{disease-bacterium}})$  expected from uniform distribution. The y-axis indicates observed  $-\log_{10}(P_{\text{virus} \times \text{disease-bacterium}})$ . The diagonal dashed line represents  $y = x$ , which corresponds to the null hypothesis. The horizontal red dashed line indicates the Bonferroni-corrected threshold ( $\alpha = 0.05$ ). (**Bottom**), A volcano plot. The x-axis indicates the effect sizes of virus  $\times$  diseases term in linear regression. The y-axis, horizontal dashed lines are the same as in (top). HC, healthy control; MS, multiple sclerosis; RA, rheumatoid arthritis; SLE, systemic lupus erythematosus.

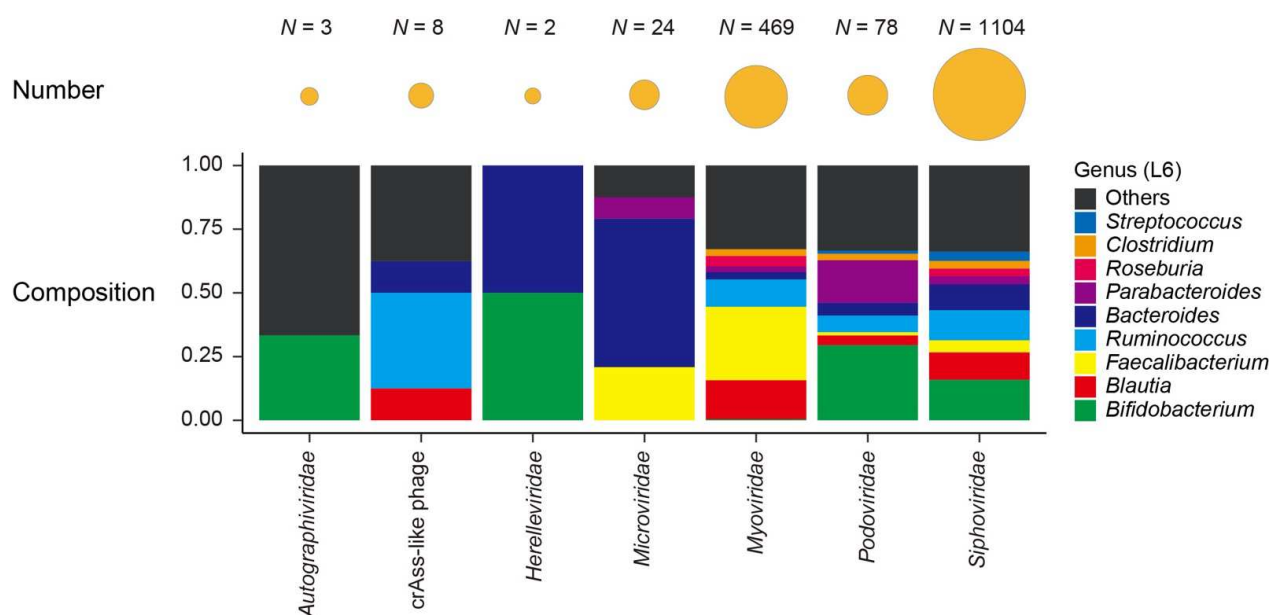

**Supplementary Figure 4. Analysis of the bacterial target of viruses based on the CRISPR spacers.**

Composition of bacterial genus with CRISPR spacers related to each viral family is represented as bar plot. Numbers of bacterium-virus pairs detected in this analysis are indicated above the bar.

CRISPR, clustered regularly interspaced short palindromic repeat; HC, healthy control; MS, multiple sclerosis; RA, rheumatoid arthritis; SLE, systemic lupus erythematosus.

**Supplementary Table 1. Characteristics of the study population.**

|                           | RA (N = 111) | SLE (N = 47) | MS (N = 29) | Control (N = 289) |
|---------------------------|--------------|--------------|-------------|-------------------|
| Mean age (sd)             | 61.4 (15.0)  | 42.9 (15.9)  | 45.6 (9.0)  | 33.2 (9.0)        |
| Sequencing batch 1        | 15 (13.5%)   | 0            | 0           | 14 (4.8%)         |
| Sequencing batch 2        | 67 (60.4%)   | 5 (10.6%)    | 0           | 27 (9.3%)         |
| Sequencing batch 3        | 29 (26.1%)   | 10 (21.3%)   | 0           | 70 (24.2%)        |
| Sequencing batch 4        | 0            | 0            | 29 (100%)   | 74 (25.6%)        |
| Sequencing batch 5        | 0            | 32 (68.1%)   | 0           | 104 (36.0%)       |
| Female                    | 88 (79.3%)   | 43 (91.5%)   | 24 (82.8%)  | 140 (46.2%)       |
| New onset                 | 70 (63.1%)   | 18 (38.3%)   | 2 (6.9%)    | -                 |
| Not new onset             | 24 (21.6%)   | 29 (61.7%)   | 27 (93.1%)  | -                 |
| Antibiotics use           | 0            | 11 (23.4%)   | 0           | 0                 |
| Proton pump inhibitor use | 13 (11.7%)   | 27 (57.4%)   | 4 (13.8%)   | -                 |
| No treatment              | 63 (56.8%)   | 14 (29.8%)   | 2 (6.9%)    | -                 |
| With treatment            | 43 (38.7%)   | 33 (70.2%)   | 27 (93.1%)  | -                 |
| Comorbidity               |              |              |             |                   |
| Diabetes                  | 7 (6.3%)     | 1 (2.1%)     | 0           | -                 |
| Hypertension              | 21 (18.9%)   | 4 (8.5%)     | 3 (10.3%)   | -                 |
| Dyslipidemia              | 19 (17.1%)   | 5 (10.6%)    | 3 (10.3%)   | -                 |
| Cardiovascular disorders  | 4 (3.6%)     | 1 (2.1%)     | 0           | -                 |
| Not evaluated             | 6 (5.4%)     | 0            | 0           | -                 |
| Treatment for RA          |              |              |             |                   |
| Steroid                   | 15 (13.5%)   | -            | -           | -                 |
| Methotrexate              | 26 (23.4%)   | -            | -           | -                 |
| Salazosulfapyridine       | 11 (9.9%)    | -            | -           | -                 |
| Iguratumod                | 1 (0.9%)     | -            | -           | -                 |
| Tacrolimus                | 1 (0.9%)     | -            | -           | -                 |
| Certolizumab pegol        | 1 (0.9%)     | -            | -           | -                 |
| Abatacept                 | 1 (0.9%)     | -            | -           | -                 |
| Atlizumab                 | 1 (0.9%)     | -            | -           | -                 |
| DAS-C, mean (sd)          | 4.1 (1.3)    | -            | -           | -                 |
| DAS-C > 4.1               | 48 (43.2%)   | -            | -           | -                 |
| Rheumatoid factor         |              |              |             |                   |
| Strong positive           | 60 (54.1%)   | -            | -           | -                 |
| Positive                  | 19 (17.1%)   | -            | -           | -                 |
| Negative                  | 27 (24.3%)   | -            | -           | -                 |
| Not evaluated             | 5 (4.5%)     | -            | -           | -                 |
| ACPA                      |              |              |             |                   |
| Strong positive           | 62 (55.9%)   | -            | -           | -                 |
| Positive                  | 10 (9.0%)    | -            | -           | -                 |
| Negative                  | 31 (27.9%)   | -            | -           | -                 |

|                           |            |            |   |   |
|---------------------------|------------|------------|---|---|
| Not evaluated             | 8 (7.2%)   | -          | - | - |
| Sero-positivity           |            |            |   |   |
| Positive                  | 85 (76.6%) | -          | - | - |
| Negative                  | 26 (23.4%) | -          | - | - |
| Steinbrocker stage        |            |            |   |   |
| I                         | 58 (52.2%) | -          | - | - |
| II                        | 18 (16.2%) | -          | - | - |
| III                       | 3 (2.7%)   | -          | - | - |
| IV                        | 3 (2.7%)   | -          | - | - |
| Not evaluated             | 29 (26.1%) | -          | - | - |
| Interstitial lung disease | 6 (5.4%)   | -          | - | - |
| Treatment for SLE         |            |            |   |   |
| Steroid                   | -          | 32 (68.1%) | - | - |
| Hydroxychloroquine        | -          | 7 (14.9%)  | - | - |
| Tacrolimus                | -          | 5 (10.6%)  | - | - |
| Ciclosporin               | -          | 1 (2.1%)   | - | - |
| Mycophenolate Mofetil     | -          | 8 (17%)    | - | - |
| Cyclophosphamide          | -          | 1 (2.1%)   | - | - |
| SLE-DAI, mean (sd)        | -          | 11.1 (8.7) | - | - |
| SLE-DAI $\geq$ 8          | -          | 28 (59.6%) | - | - |
| Manifestation of SLE      |            |            |   |   |
| Psychosis                 | -          | 1 (2.1%)   | - | - |
| Vision impairment         | -          | 1 (2.1%)   | - | - |
| Headache                  | -          | 4 (8.5%)   | - | - |
| Cerebrovascular disease   | -          | 1 (2.1%)   | - | - |
| Vasculitis                | -          | 1 (2.1%)   | - | - |
| Arthritis                 | -          | 14 (29.8%) | - | - |
| Myositis                  | -          | 2 (4.3%)   | - | - |
| Urinary cast              | -          | 9 (19.1%)  | - | - |
| Hematuria                 | -          | 5 (10.6%)  | - | - |
| Proteinuria               | -          | 13 (27.7%) | - | - |
| Pyuria                    | -          | 7 (14.9%)  | - | - |
| Rash                      | -          | 15 (31.9%) | - | - |
| Alopecia                  | -          | 7 (14.9%)  | - | - |
| Mucosal ulcer             | -          | 5 (10.6%)  | - | - |
| Pleurisy                  | -          | 5 (10.6%)  | - | - |
| Pericarditis              | -          | 2 (4.3%)   | - | - |
| Low complement            | -          | 34 (72.3%) | - | - |
| Increased DNA binding     | -          | 30 (63.8%) | - | - |
| Fever                     | -          | 14 (29.8%) | - | - |
| Thombocytopenia           | -          | 2 (4.3%)   | - | - |



|                         |   |             |            |   |
|-------------------------|---|-------------|------------|---|
| Leucopenia              | - | 12 (25.5%)  | -          | - |
| Seizure                 | - | 0           | -          | - |
| Organic brain syndrome  | - | 0           | -          | - |
| Cranial nerve disorder  | - | 0           | -          | - |
| Lupus nephritis         | - | 20 (42.6 %) | -          | - |
| <hr/>                   |   |             |            |   |
| Treatment for MS        |   |             |            |   |
| Steroid                 | - | -           | 6 (20.7%)  | - |
| Dimethyl fumarate       | - | -           | 9 (31.0%)  | - |
| Fingolimod              | - | -           | 7 (24.1%)  | - |
| Interferon              | - | -           | 4 (13.8%)  | - |
| Glatiramer acetate      | - | -           | 6 (20.7%)  | - |
| EDSS, mean (sd)         | - | -           | 2.6 (2.0)  | - |
| EDSS $\geq$ 4.5         | - | -           | 8 (27.6%)  | - |
| Spinal cord involvement | - | -           | 18 (62.1%) | - |

ACPA, anti-citrullinated protein/peptide antibody; DAS-C, Disease Activity Score 28 using C-reactive protein; EDSS, Expanded Disability Status Scale; MS, multiple sclerosis; RA, rheumatoid arthritis; RF, rheumatoid factor; sd, standard deviation; SLE, systemic lupus erythematosus; SLE-DAI, SLE Disease Activity Index.

\*<sup>1</sup> Information about the date of onset could not be obtained for 17 RA patients.

\*<sup>2</sup> Information about treatment and proton pump inhibitor usage could not be obtained for five RA patients.

\*<sup>3</sup> Information about the presence of interstitial lung disease for six RA patients.

\*<sup>4</sup> DAS-C could not be obtained for 11 RA patients.

\*<sup>5</sup> Information about antibiotics usage could not be obtained for a SLE patient.

**Supplementary Table 2. Detection ratio of the viral clades.**

|                          | Sequencing<br>batch 1 | Sequencing<br>batch 2 | Sequencing<br>batch 3 | Sequencing<br>batch 4 | Sequencing<br>batch 5 |
|--------------------------|-----------------------|-----------------------|-----------------------|-----------------------|-----------------------|
| Number of samples        | 29                    | 99                    | 109                   | 103                   | 136                   |
| Detection ratio (%)      |                       |                       |                       |                       |                       |
| <i>Autographiviridae</i> | 41.4                  | 29.3                  | 30.3                  | 21.4                  | 25.0                  |
| crAss-like phage         | 72.4                  | 62.6                  | 64.2                  | 66.0                  | 63.2                  |
| <i>Herelleviridae</i>    | 65.5                  | 42.4                  | 33.0                  | 21.4                  | 38.2                  |
| <i>Microviridae</i>      | 55.2                  | 51.5                  | 45.9                  | 24.3                  | 62.5                  |
| <i>Myoviridae</i>        | 100.0                 | 100.0                 | 100.0                 | 100.0                 | 100.0                 |
| <i>Phycodnaviridae</i>   | 86.2                  | 53.5                  | 61.5                  | 44.7                  | 63.2                  |
| <i>Podoviridae</i>       | 96.6                  | 93.9                  | 98.2                  | 95.1                  | 97.1                  |
| <i>Siphoviridae</i>      | 100.0                 | 100.0                 | 100.0                 | 100.0                 | 100.0                 |

**Supplementary Table 3. Association of age and sex to the viral abundances.**

Age (N = 476)

| Viruses                  | Effect size          | SE                   | P     |
|--------------------------|----------------------|----------------------|-------|
| <i>Autographiviridae</i> | $3.8 \times 10^{-4}$ | 0.0020               | 0.85  |
| crAss-like phage         | 0.0064               | 0.0036               | 0.076 |
| <i>Herelleviridae</i>    | 0.0031               | 0.0021               | 0.13  |
| <i>Microviridae</i>      | $3.4 \times 10^{-5}$ | 0.0025               | 0.99  |
| <i>Myoviridae</i>        | 0.0016               | $8.3 \times 10^{-4}$ | 0.047 |
| <i>Phycodnaviridae</i>   | -0.0016              | 0.0027               | 0.54  |
| <i>Podoviridae</i>       | 0.0026               | 0.0021               | 0.21  |
| <i>Siphoviridae</i>      | $7.8 \times 10^{-4}$ | $4.5 \times 10^{-4}$ | 0.087 |

Male (N = 476)

| Viruses                  | Effect size | SE    | P    |
|--------------------------|-------------|-------|------|
| <i>Autographiviridae</i> | -0.026      | 0.056 | 0.64 |
| crAss-like phage         | -0.024      | 0.10  | 0.81 |
| <i>Herelleviridae</i>    | 0.029       | 0.059 | 0.63 |
| <i>Microviridae</i>      | 0.047       | 0.072 | 0.51 |
| <i>Myoviridae</i>        | 0.035       | 0.024 | 0.14 |
| <i>Phycodnaviridae</i>   | 0.040       | 0.077 | 0.61 |
| <i>Podoviridae</i>       | -0.027      | 0.059 | 0.64 |
| <i>Siphoviridae</i>      | -0.0060     | 0.013 | 0.64 |

SE, standard error.

**Supplementary Table 4. Sub-analysis of the crAss-like phage abundance for RA.**

| Case-control comparison                                                                   |             |       |          |
|-------------------------------------------------------------------------------------------|-------------|-------|----------|
| Sample set                                                                                | Effect size | SE    | <i>P</i> |
| All                                                                                       | -0.476      | 0.173 | 0.0060   |
| Remove male                                                                               | -0.568      | 0.197 | 0.0040   |
| Remove non-new onset patients                                                             | -0.385      | 0.200 | 0.055    |
| Remove patients with proton pump inhibitors                                               | -0.441      | 0.183 | 0.016    |
| Remove patients with steroids                                                             | -0.475      | 0.183 | 0.010    |
| Remove patients with treatment for RA                                                     | -0.520      | 0.211 | 0.014    |
| Comparison within case                                                                    |             |       |          |
| Objective                                                                                 | Effect size | SE    | <i>P</i> |
| Not treated                                                                               | -0.008      | 0.207 | 0.97     |
| New onset                                                                                 | 0.313       | 0.271 | 0.25     |
| DAS-C > 4.1                                                                               | 0.018       | 0.219 | 0.93     |
| CRP > 1.0 mg / L ( <i>N</i> <sub>CRP high</sub> = 52 vs <i>N</i> <sub>CRP low</sub> = 52) | 0.291       | 0.227 | 0.20     |

CRP, C-reactive protein; DAS-C, Disease Activity Score 28 (DAS28) using C-reactive protein; SE, standard error; RA, rheumatoid arthritis.

**Supplementary Table 5. Sub-analysis of the viral abundance for SLE.****crAss-like phage**

| Case-control comparison                     |             |       |          |
|---------------------------------------------|-------------|-------|----------|
| Sample set                                  | Effect size | SE    | <i>P</i> |
| All                                         | -0.514      | 0.206 | 0.012    |
| Remove male                                 | -0.484      | 0.218 | 0.027    |
| Remove non-new onset patients               | -0.946      | 0.356 | 0.0078   |
| Remove patients with antibiotics            | -0.372      | 0.225 | 0.099    |
| Remove patients with proton pump inhibitors | -0.724      | 0.319 | 0.023    |
| Remove patients with steroids               | -0.799      | 0.353 | 0.023    |
| Remove patients with treatment for SLE      | -0.945      | 0.399 | 0.018    |
| Comparison within case                      |             |       |          |
| Objective                                   | Effect size | SE    | <i>P</i> |
| Not treated                                 | -0.806      | 0.564 | 0.15     |
| New onset                                   | -0.593      | 0.580 | 0.31     |
| SLE-DAI $\geq$ 8                            | -1.147      | 0.634 | 0.070    |

**Podoviridae**

| Case-control comparison                     |             |       |          |
|---------------------------------------------|-------------|-------|----------|
| Sample set                                  | Effect size | SE    | <i>P</i> |
| All                                         | -0.947      | 0.330 | 0.0041   |
| Remove male                                 | -0.653      | 0.357 | 0.067    |
| Remove non-new onset patients               | -1.231      | 0.469 | 0.0087   |
| Remove patients with antibiotics            | -0.601      | 0.371 | 0.11     |
| Remove patients with proton pump inhibitors | -0.591      | 0.519 | 0.26     |
| Remove patients with steroids               | -1.238      | 0.492 | 0.012    |
| Remove patients with treatment for SLE      | -1.350      | 0.519 | 0.0093   |
| Comparison within case                      |             |       |          |
| Objective                                   | Effect size | SE    | <i>P</i> |
| Not treated                                 | -0.289      | 0.593 | 0.63     |
| New onset                                   | -0.165      | 0.573 | 0.77     |
| SLE-DAI $\geq$ 8                            | 0.313       | 0.736 | 0.67     |

SE, standard error; SLE, systemic lupus erythematosus; SLE-DAI, SLE Disease Activity Index.

**Supplementary Table 6. Sub-analysis of the crAss-like phage abundance for combined autoimmune diseases (RA, SLE, and MS).**

| Case-control comparison                                         |             |       |                      |
|-----------------------------------------------------------------|-------------|-------|----------------------|
| Sample set                                                      | Effect size | SE    | <i>P</i>             |
| All                                                             | -0.429      | 0.126 | $6.5 \times 10^{-4}$ |
| Remove male                                                     | -0.464      | 0.140 | $9.2 \times 10^{-4}$ |
| Remove non-new onset patients                                   | -0.534      | 0.166 | 0.0013               |
| Remove patients with antibiotics                                | -0.387      | 0.131 | 0.0031               |
| Remove patients with proton pump inhibitors                     | -0.417      | 0.140 | 0.0029               |
| Remove patients with steroids                                   | -0.406      | 0.147 | 0.0057               |
| Remove patients with treatment for combined autoimmune diseases | -0.549      | 0.180 | 0.0022               |
| Remove sequencing batch 4                                       | -0.499      | 0.137 | $2.6 \times 10^{-4}$ |
| Case-control comparison (Per sequencing batch analysis)         |             |       |                      |
| Sequencing batch                                                | Effect size | SE    | <i>P</i>             |
| Batch 1                                                         | -0.988      | 0.551 | 0.073                |
| Batch 2                                                         | -0.270      | 0.248 | 0.28                 |
| Batch 3                                                         | -0.437      | 0.296 | 0.14                 |
| Batch 4                                                         | 0.375       | 0.463 | 0.42                 |
| Batch 5                                                         | -0.451      | 0.269 | 0.094                |
| Comparison within the case                                      |             |       |                      |
| Objective                                                       | Effect size | SE    | <i>P</i>             |
| Not treated                                                     | -0.087      | 0.179 | 0.63                 |
| New onset                                                       | -0.007      | 0.204 | 0.97                 |

SE, standard error.

**Supplementary Table 7. Meta-analysis for the association between combined autoimmune diseases (RA, SLE, and MS) and the viral abundances.**

| Viruses                  | Fixed-effect meta-analysis |       |          | Random effect meta-analysis |       |          |          |            |
|--------------------------|----------------------------|-------|----------|-----------------------------|-------|----------|----------|------------|
|                          | Effect size                | SE    | <i>P</i> | Effect size                 | SE    | <i>P</i> | <i>Q</i> | <i>Q-P</i> |
| <i>Autographiviridae</i> | 0.027                      | 0.241 | 0.91     | 0.027                       | 0.241 | 0.91     | 0.51     | 0.77       |
| crAss-like phage         | -0.392                     | 0.139 | 0.0047   | -0.392                      | 0.139 | 0.0047   | 3.03     | 0.22       |
| <i>Herelleviridae</i>    | -0.474                     | 0.267 | 0.076    | -0.474                      | 0.267 | 0.076    | 3.71     | 0.16       |
| <i>Microviridae</i>      | 0.302                      | 0.193 | 0.12     | 0.302                       | 0.193 | 0.12     | 1.32     | 0.52       |
| <i>Myoviridae</i>        | 0.169                      | 0.569 | 0.77     | 0.030                       | 0.688 | 0.97     | 2.08     | 0.35       |
| <i>Phycodnaviridae</i>   | -0.131                     | 0.194 | 0.50     | -0.150                      | 0.225 | 0.51     | 2.36     | 0.31       |
| <i>Podoviridae</i>       | -0.215                     | 0.256 | 0.40     | -0.215                      | 0.256 | 0.40     | 1.75     | 0.42       |
| <i>Siphoviridae</i>      | -1.746                     | 1.127 | 0.12     | -1.746                      | 1.127 | 0.12     | 1.36     | 0.51       |

SE, standard error.

**Supplementary Table 8. Case–control comparison of the absence/presence state of crAss-like phages for combined autoimmune diseases (RA, SLE, and MS).**

| Viruses          | Effect size | SE    | <i>P</i> | <i>N</i> detection in case | <i>N</i> detection in control |
|------------------|-------------|-------|----------|----------------------------|-------------------------------|
| crAss-like phage | -0.734      | 0.259 | 0.0046   | 113 (60.4%)                | 194 (67.1%)                   |

SE, standard error.



**Supplementary Table 9. Case–control comparison of *crAssphage* (NC\_024711.1) and other *crAss*-like phages for combined autoimmune diseases (RA, SLE, and MS).**

| Viruses                         | Effect size | SE    | <i>P</i> |
|---------------------------------|-------------|-------|----------|
| <i>crAssphage</i> (NC_024711.1) | −0.378      | 0.130 | 0.0036   |
| Other <i>crAss</i> -like phages | −0.374      | 0.159 | 0.019    |

SE, standard error.

**Supplementary Table 10. Virus-bacterium pairs with significant association.**

| Viruses            | Bacteria                                | Level of bacteria | Effect size | SE    | $P_{\text{virus-bacterium}}$ | $q$                  |
|--------------------|-----------------------------------------|-------------------|-------------|-------|------------------------------|----------------------|
| <i>Podoviridae</i> | <i>Faecalibacterium sp.</i>             | Species (L7)      | 0.192       | 0.035 | $7.9 \times 10^{-8}$         | $5.1 \times 10^{-4}$ |
| <i>Podoviridae</i> | <i>Faecalibacterium cf. prausnitzii</i> | Species (L7)      | 0.186       | 0.038 | $1.3 \times 10^{-6}$         | $4.2 \times 10^{-3}$ |

SE, standard error.

**Supplementary Table 11. Sub-analysis for the virus-bacterium association analysis.*****Podoviridae* and *Faecalibacterium sp.***

| Sample set                                                                        | Effect size | SE    | $P_{\text{virus-bacterium}}$ |
|-----------------------------------------------------------------------------------|-------------|-------|------------------------------|
| All                                                                               | 0.192       | 0.035 | $7.9 \times 10^{-8}$         |
| Remove male                                                                       | 0.204       | 0.044 | $4.7 \times 10^{-6}$         |
| Remove non-new onset patients                                                     | 0.180       | 0.040 | $7.3 \times 10^{-6}$         |
| Only HC                                                                           | 0.194       | 0.048 | $6.2 \times 10^{-5}$         |
| Remove patients with antibiotics                                                  | 0.179       | 0.035 | $5.8 \times 10^{-7}$         |
| Remove patients with proton pump inhibitors                                       | 0.192       | 0.036 | $2.1 \times 10^{-7}$         |
| Remove patients with steroids                                                     | 0.188       | 0.038 | $8.4 \times 10^{-7}$         |
| Remove patients with treatment for combined autoimmune diseases (RA, SLE, and MS) | 0.198       | 0.041 | $1.6 \times 10^{-6}$         |

***Podoviridae* and *Faecalibacterium cf. prausnitzii***

| Sample set                                                                        | Effect size | SE    | $P_{\text{virus-bacterium}}$ |
|-----------------------------------------------------------------------------------|-------------|-------|------------------------------|
| All                                                                               | 0.186       | 0.038 | $1.3 \times 10^{-6}$         |
| Remove male                                                                       | 0.191       | 0.047 | $5.7 \times 10^{-5}$         |
| Remove non-new onset patients                                                     | 0.189       | 0.042 | $1.1 \times 10^{-5}$         |
| Only HC                                                                           | 0.209       | 0.051 | $6.0 \times 10^{-5}$         |
| Remove patients with antibiotics                                                  | 0.181       | 0.038 | $2.4 \times 10^{-6}$         |
| Remove patients with proton pump inhibitors                                       | 0.200       | 0.040 | $6.4 \times 10^{-7}$         |
| Remove patients with steroids                                                     | 0.196       | 0.040 | $1.8 \times 10^{-6}$         |
| Remove patients with treatment for combined autoimmune diseases (RA, SLE, and MS) | 0.206       | 0.044 | $3.6 \times 10^{-6}$         |

HC, healthy control; MS, multiple sclerosis; RA, rheumatoid arthritis; SE, standard error; SLE, systemic lupus erythematosus.
